# Supplementary material for: Integron activity accelerates the evolution of antibiotic resistance
Source: eLife. 2021 Feb 26;10:e62474. doi: 10.7554/eLife.62474 (PMC8024014; doi:10.7554/eLife.62474)
Supplement: Supplementary file 2. [file elife-62474-supp2.xlsx]

## Sheet: breseq mutations (ramping)
Description: this sheet contains all the mutations identified by breseq present in the populations at a frequency above 30% from the ramping treatment at x1024MIC. Mutations are listed by genome (chromosome then plasmid) and gene mutations frequency (with most mutated genes found at the top)
Type of mutation (SNP = single nucleotide polymorphism, DEL = deletion, INS = insertion)	Unique id for each mutation	Genome where the mutation is found: NC_002516 corresponds to the PA01 chromosome while array20320Short corresponds to the R388:WTA3 or R388:DeltaIntA3 plasmid	Mutation position in the genome	Mutation effect: new nucleotide (SNP), insertion sequence (INS) or size of the deletion (DEL)																																					Effect of the mutation: indicate if mutation is synonymous, non synonymous or non sense (for SNPs) or if in a coding or intergenic region (INS and DEL)
type	id	genome	position	effect	Delta_1	Delta_2	Delta_3	Delta_4	Delta_5	Delta_6	WT_1	WT_2	WT_3	WT_4	WT_5	WT_6	WT_7	WT_8	WT_9	WT_10	WT_11	WT_12	WT_13	WT_14	WT_15	WT_16	WT_17	WT_18	WT_19	WT_20	WT_21	Delta_Control_18MIC	WT_Control_18MIC	Delta_Control_noAB	WT_Control_noAB	Control_Delta_ref	Control_WT_ref	PAO1_ref	PAO1_ref_bis	gene_name	effect	product
SNP	842	NC_002516	5852197	C	0	0	0	0	0	0	0	0	0	0	0	1	0	0	0	0	1	0	0	0	0	0	0	1	0	0	0	0	0	0	0	0	0	0	0	amgS	snp_nonsynonymous	protein AmgS
DEL	1561	NC_002516	5852365	12	0	1	0	0	0	0	0	0	0	0	0	0	0	0	0	0	0	0	1	0	0	0	0	0	0	0	0	0	0	0	0	0	0	0	0	amgS	coding (183-194/1320 nt)	protein AmgS
INS	1863	NC_002516	5851829	CAGGCG	0	0	0	0	0	0	0	0	0	0	0	0	0	0	0	0	0	0	0	0	0	0	0	0	1	0	0	0	0	0	0	0	0	0	0	amgS	coding (730/1320 nt)	protein AmgS
INS	1260	NC_002516	5852255	CATCTG	0	0	0	0	0	0	0	0	0	0	0	0	0	0	0	0	0	0	0	0	0	1	0	0	0	0	0	0	0	0	0	0	0	0	0	amgS	coding (304/1320 nt)	protein AmgS
DEL	915	NC_002516	5852414	3	0	0	0	0	0	0	0	0	0	0	0	0	1	0	0	0	0	0	0	0	0	0	0	0	0	0	0	0	0	0	0	0	0	0	0	amgS	coding (143-145/1320 nt)	protein AmgS
SNP	1003	NC_002516	5852051	A	0	0	0	0	0	0	0	0	0	0	0	0	0	0.911291	0	0	0	0	0	0	0	0	0	0	0	0	0	0	0	0	0	0	0	0	0	amgS	snp_nonsynonymous	protein AmgS
DEL	1004	NC_002516	5852404	9	0	0	0	0	0	0	0	0	0	0	0	0	0	0	0	0	0	0	0	0	0.888179	0	0	0	0	0	0	0	0	0	0	0	0	0	0	amgS	coding (147-155/1320 nt)	protein AmgS
DEL	639	NC_002516	5852389	3	0	0	0	0	0	0	0	0	0	0.871972	0	0	0	0	0	0	0	0	0	0	0	0	0	0	0	0	0	0	0	0	0	0	0	0	0	amgS	coding (168-170/1320 nt)	protein AmgS
SNP	1092	NC_002516	5852180	T	0	0	0	0	0	0	0	0	0	0	0	0	0	0	0.782262	0	0	0	0	0	0	0	0	0	0	0	0	0	0	0	0	0	0	0	0	amgS	snp_nonsynonymous	protein AmgS
DEL	2202	NC_002516	2212767	11	0	0	0	0	1	0	0	0	0	0	0	0	0	0	0	0	0	0	0	0	0	0	0	0	0	0	0	0	0	0	0	0	0	0	0	PA2020	coding (91-101/633 nt)	transcriptional regulator
DEL	1608	NC_002516	2212855	15	0	0	0	0	0	0	0	0	0	0	0	0	0	0	0	0	0	0	0	1	0	0	0	0	0	0	0	0	0	0	0	0	0	0	0	PA2020	coding (179-193/633 nt)	transcriptional regulator
DEL	1088	NC_002516	2212859	70	0	0	0	0	0	0	0	0	0	0	0	0	0	0	1	0	0	0	0	0	0	0	0	0	0	0	0	0	0	0	0	0	0	0	0	PA2020	coding (183-252/633 nt)	transcriptional regulator
DEL	1992	NC_002516	2212891	10	1	0	0	0	0	0	0	0	0	0	0	0	0	0		0	0	0	0	0	0	0	0	0	0	0	0	0	0	0	0	0	0	0	0	PA2020	coding (215-224/633 nt)	transcriptional regulator
DEL	2155	NC_002516	2213041	11	0	0	0	1	0	0	0	0	0	0	0	0	0	0	0	0	0	0	0	0	0	0	0	0	0	0	0	0	0	0	0	0	0	0	0	PA2020	coding (365-375/633 nt)	transcriptional regulator
DEL	1761	NC_002516	2213056	14	0	0	0	0	0	0	0	0	0	0	0	0	0	0	0	0	0	0	0	0	0	0	1	0	0	0	0	0	0	0	0	0	0	0	0	PA2020	coding (380-393/633 nt)	transcriptional regulator
DEL	239	NC_002516	2213133	6	0	0	0	0	0	0	1	0	0	0	0	0	0	0	0	0	0	0	0	0	0	0	0	0	0	0	0	0	0	0	0	0	0	0	0	PA2020	coding (457-462/633 nt)	transcriptional regulator
INS	541	NC_002516	2213158	C	0	0	0	0	0	0	0	0	1	0	0	0	0	0	0	0	0	0	0	0	0	0	0	0	0	0	0	0	0	0	0	0	0	0	0	PA2020	coding (482/633 nt)	transcriptional regulator
INS	1857	NC_002516	2213159	TAT	0	0	0	0	0	0	0	0	0	0	0	0	0	0	0	0	0	0	0	0	0	0	0	0	1	0	0	0	0	0	0	0	0	0	0	PA2020	coding (483/633 nt)	transcriptional regulator
DEL	1955	NC_002516	2213175	13	0	0	0	0	0	0	0	0	0	0	0	0	0	0	0	0	0	0	0	0	0	0	0	0	0	0	1	0	0	0	0	0	0	0	0	PA2020	coding (499-511/633 nt)	transcriptional regulator
DEL	1806	NC_002516	2213272	6	0	0	0	0	0	0	0	0	0	0	0	0	0	0	0	0	0	0	0	0	0	0	0	1	0	0	0	0	0	0	0	0	0	0	0	PA2020	coding (596-601/633 nt)	transcriptional regulator
DEL	271	NC_002516	5090956	12	0	0	0	0	0	0	1	0	0	0	0	0	0	0	0	0	0	0	0	0	0	0	0	0	0	0	0	0	0	0	0	0	0	0	0	rluD	coding (849-860/963 nt)	pseudouridine synthase
SNP	549	NC_002516	5090980	G	0	0	0	0	0	0	0	0	1	0	0	0	0	0	0	0	0	0	0	0	0	0	0	0	0	0	0	0	0	0	0	0	0	0	0	rluD	snp_nonsynonymous	pseudouridine synthase
INS	2207	NC_002516	5091163	G	0	0	0	0	1	0	0	0	0	0	0	0	0	0	0	0	0	0	0	0	0	0	0	0	0	0	0	0	0	0	0	0	0	0	0	rluD	coding (653/963 nt)	pseudouridine synthase
DEL	1715	NC_002516	5091317	11	0	0	0	0	0	0	0	0	0	0	0	0	0	0	0	0	0	0	0	0	0	1	0	0		0	0	0	0	0	0	0	0	0	0	rluD	coding (489-499/963 nt)	pseudouridine synthase
DEL	1860	NC_002516	5091317	18	0	0	0	0	0	0	0	0	0	0	0	0	0	0	0	0	0	0	0	0	0	0	0	0	1	0	0	0	0	0	0	0	0	0	0	rluD	coding (482-499/963 nt)	pseudouridine synthase
DEL	1996	NC_002516	5091355	1	1	0	0	0	0	0	0	0	0	0	0	0	0	0	0	0	0	0	0	0	0	0	0	0	0	0	0	0	0	0	0	0	0	0	0	rluD	coding (461/963 nt)	pseudouridine synthase
INS	2160	NC_002516	5091355	GGGCCTCC	0	0	0	1	0	0	0	0	0	0	0	0	0	0	0	0	0	0	0	0	0	0	0	0	0	0	0	0	0	0	0	0	0	0	0	rluD	coding (461/963 nt)	pseudouridine synthase
DEL	745	NC_002516	5091370	1	0	0	0	0	0	0	0	0	0	0	1	0	0	0	0	0	0	0	0	0	0	0	0	0	0	0	0	0	0	0	0	0	0	0	0	rluD	coding (446/963 nt)	pseudouridine synthase
INS	1000	NC_002516	5091640	GGACG	0	0	0	0	0	0	0	0	0	0	0	0	0	1	0	0	0	0	0	0	0	0	0	0	0	0	0	0	0	0	0	0	0	0	0	rluD	coding (176/963 nt)	pseudouridine synthase
DEL	1611	NC_002516	5091653	11	0	0	0	0	0	0	0	0	0	0	0	0	0	0	0	0	0	0	0	1	0	0	0	0	0	0	0	0	0	0	0	0	0	0	0	rluD	coding (153-163/963 nt)	pseudouridine synthase
DEL	1958	NC_002516	5091769	1	0	0	0	0	0	0	0	0	0	0	0	0	0	0	0	0	0	0	0	0	0	0	0	0	0	0	1	0	0	0	0	0	0	0	0	rluD	coding (47/963 nt)	pseudouridine synthase
SNP	1849	NC_002516	1334556	A		0	0	0	0	0	0			0				0	0	0		0	0	0	0	0	0	0	1	0	0	0	0	0	0	0	0	0	0	PA1232	snp_nonsynonymous	hypothetical protein
SNP	1376	NC_002516	1334556	G		0	0	0	0	0	0			0				0	0	1		0	0	0	0	0	0	0	0	0	0	0	0	0	0	0	0	0	0	PA1232	snp_nonsynonymous	hypothetical protein
SNP	1439	NC_002516	1951104	C	0	0	0	0	0	0	0	0	0	0	0	0	0	0	0	0	1	0	0	0	0	0	0	0	0	0	0	0	0	0	0	0	0	0	0	parS	snp_nonsynonymous	two-component sensor ParS
SNP	1913	NC_002516	1951335	G	0	0	0	0	0	0	0	0	0	0	0	0	0	0	0	0	0	0	0	0	0	0	0	0	0	1	0	0	0	0	0	0	0	0	0	parS	snp_nonsynonymous	two-component sensor ParS
INS	1497	NC_002516	2212665	G	0	0	0	0	0	0	0	0	0	0	0	0	0	0	0	0	0	0.770597	0	0	0	0	0	0	0	0	0	0	0	0	0	0	0	0	0	PA2019/PA2020	intergenic (-153/-12)	multidrug efflux lipoprotein/transcriptional regulator
INS	1498	NC_002516	2212665	A	0	0	0	0	0	0	0	0	0	0	0	0	0	0	0	0	0	0.77059	0	0	0	0	0	0	0	0	0	0	0	0	0	0	0	0	0	PA2019/PA2020	intergenic (-153/-12)	multidrug efflux lipoprotein/transcriptional regulator
SNP	267	NC_002516	4962241	G	0	0	0	0	0	0.382455	0.335449	0	0	0	0	0	0	0	0	0	0	0	0	0	0	0	0	0	0	0	0.316596	0	0	0	0	0	0	0	0	sspA/PA4429	intergenic (-54/+32)	stringent starvation protein A/cytochrome C1
DEL	216	NC_002516	1100709	12	0	0	0	0	0	0	1	0	0	0	0	0	0	0	0	0	0	0	0	0	0	0	0	0	0	0	0	0	0	0	0	0	0	0	0	PA1016	coding (1041-1052/1152 nt)	thiolase
DEL	1912	NC_002516	1147499	12	0	0	0	0	0	0	0	0	0	0	0	0	0	0	0	0	0	0	0	0	0	0	0	0	0	1	0	0	0	0	0	0	0	0	0	PA1059	coding (32-43/348 nt)	monovalent cation/H+ antiporter subunit G
SNP	740	NC_002516	2493497	C	0	0	0	0	0	0	0	0	0	0	1	0	0	0	0	0	0	0	0	0	0	0	0	0	0	0	0	0	0	0	0	0	0	0	0	PA2264	snp_nonsynonymous	hypothetical protein
SNP	2113	NC_002516	2906109	C	0	0	1	0	0	0	0	0	0	0	0	0	0	0	0	0	0	0	0	0	0	0	0	0	0	0	0	0	0	0	0	0	0	0	0	PA2570.1/PA2571	intergenic (-58/+57)	tRNA-Leu/two-component sensor
DEL	1993	NC_002516	2984581	131	1	0	0	0	0	0	0	0	0	0	0	0	0	0	0	0	0	0	0	0	0	0	0	0	0	0	0	0	0	0	0	0	0	0	0	nuoD	coding (619-749/1782 nt)	NADH:-quinone oxidoreductase subunit C/D
DEL	2204	NC_002516	2989872	2	0	0	0	0	1	0	0	0	0	0	0	0	0	0	0	0	0	0	0	0	0	0	0	0	0	0	0	0	0	0	0	0	0	0	0	nuoG	coding (2152-2153/2718 nt)	NADH-quinone oxidoreductase subunit G
DEL	2114	NC_002516	2991893	10	0	0	1	0	0	0	0	0	0	0	0	0	0	0	0	0	0	0	0	0	0	0	0	0	0	0	0	0	0	0	0	0	0	0	0	nuoI	coding (452-461/549 nt)	NADH-quinone oxidoreductase subunit I
DEL	2157	NC_002516	2995699	1	0	0	0	1	0	0	0	0	0	0	0	0	0	0	0	0	0	0	0	0	0	0	0	0	0	0	0	0	0	0	0	0	0	0	0	nuoM	coding (972/1530 nt)	NADH-quinone oxidoreductase subunit M
DEL	1956	NC_002516	3334907	10	0	0	0	0	0	0	0	0	0	0	0	0	0	0	0	0	0	0	0	0	0	0	0	0	0	0	1	0	0	0	0	0	0	0	0	rne	coding (2027-2036/3174 nt)	ribonuclease E
SNP	255	NC_002516	3799585	C	0	0	0	0	0	0	1	0	0	0	0	0	0	0	0	0	0	0	0	0	0	0	0	0	0	0	0	0	0	0	0	0	0	0	0	nosD	snp_nonsynonymous	copper-binding periplasmic protein
SNP	441	NC_002516	4771871	T	0	0	0	0	0	0	0	1	0	0	0	0	0	0	0	0	0	0	0	0	0	0	0	0	0	0	0	0	0	0	0	0	0	0	0	rpsL	snp_nonsynonymous	30S ribosomal protein S12
SNP	2159	NC_002516	4772491	A	0	0	0	1	0	0	0	0	0	0	0	0	0	0	0	0	0	0	0	0	0	0	0	0	0	0	0	0	0	0	0	0	0	0	0	rpoC	snp_nonsynonymous	DNA-directed RNA polymerase subunit beta'
SNP	914	NC_002516	5116300	T	0	0	0	0	0	0	0	0	0	0	0	0	1	0	0	0	0	0	0	0	0	0	0	0	0	0	0	0	0	0	0	0	0	0	0	rpmA/rplU	intergenic (-11/+13)	50S ribosomal protein L27/50S ribosomal protein L21
DEL	1560	NC_002516	5240106	12	0	0	0	0	0	0	0	0	0	0	0	0	0	0	0	0	0	0	1	0	0	0	0	0	0	0	0	0	0	0	0	0	0	0	0	PA4671/PA4672	intergenic (+26/-5)	50S ribosomal protein L25/general stress protein Ctc/peptidyl-tRNA hydrolase
INS	1385	NC_002516	5269237	C	0	0	0	0	0	0	0	0	0	0	0	0	0	0	0	1	0	0	0	0	0	0	0	0	0	0	0	0	0	0	0	0	0	0	0	PA4690.5	noncoding (23/1536 nt)	16S ribosomal RNA
DEL	551	NC_002516	5707756	12	0	0	0	0	0	0	0	0	1	0	0	0	0	0	0	0	0	0	0	0	0	0	0	0	0	0	0	0	0	0	0	0	0	0	0	tatC	coding (521-532/804 nt)	transporter TatC
DEL	747	NC_002516	6160737	69	0	0	0	0	0	0	0	0	0	0	1	0	0	0	0	0	0	0	0	0	0	0	0	0	0	0	0	0	0	0	0	0	0	0	0	PA5471/PA5472	intergenic (-38/+262)	hypothetical protein/hypothetical protein
DEL	2073	NC_002516	6257044	298	0	1	0	0	0	0	0	0	0	0	0	0	0	0	0	0	0	0	0	0	0	0	0	0	0	0	0	0	0	0	0	0	0	0	0	[gidB]â€“[gidA]	[gidB],[gidA]	genes_inactivated=gidB
DEL	2208	NC_002516	6264325	1	0	0	0	0	1	0	0	0	0	0	0	0	0	0	0	0	0	0	0	0	0	0	0	0	0	0	0	0	0	0	0	0	0	0	0	rpmH	coding (37/135 nt)	50S ribosomal protein L34
SNP	1659	NC_002516	4784553	C	0	0	0	0	0	0	0	0	0	0	0	0	0	0	0	0	0	0	0	0	0.935146	0	0	0	0	0	0	0	0	0	0	0	0	0	0	tufB	snp_synonymous	elongation factor Tu
SNP	1654	NC_002516	786915	T	0	0	0	0	0	0	0	0	0	0	0	0	0	0	0	0	0	0	0	0	0.928659	0	0	0	0	0	0	0	0	0	0	0	0	0	0	PA0715	snp_nonsynonymous	hypothetical protein
SNP	743	NC_002516	3548495	T	0	0	0	0	0	0	0	0	0	0	0.820657	0	0	0	0	0	0	0	0	0	0	0	0	0	0	0	0	0	0	0	0	0	0	0	0	rpsA	snp_nonsynonymous	30S ribosomal protein S1
SNP	1807	NC_002516	4666412	A	0	0	0	0	0	0	0	0	0	0	0	0	0	0	0	0	0	0	0	0	0	0	0	0.530894	0	0	0	0	0	0	0	0	0	0	0	PA4169	snp_nonsynonymous	hypothetical protein
SNP	1509	NC_002516	5466832	T	0	0	0	0	0	0	0	0	0	0	0	0	0	0	0	0	0	0.527305	0	0	0	0	0	0	0	0	0	0	0	0	0	0	0	0	0	PA4869	snp_nonsense	hypothetical protein
INS	2109	NC_002516	1671363	CCGAGC	0	0	0.505665	0	0	0	0	0	0	0	0	0	0	0	0	0	0	0	0	0	0	0	0	0	0	0	0	0	0	0	0	0	0	0	0	dnaX	coding (1375/2046 nt)	DNA polymerase III subunits gamma/tau
INS	618	NC_002516	785686	TCCCCGCTCCCCGCTCCCCGCTCCCCGCTCCCCGCTCCCCGCTCCCCGCTCCCCGCTCCCCGC			0				0	0		0	0	0	0	0	0		0				0	0.310112		0							0		0			phrD/PA0715	intergenic (+116/-283)	PhrD/hypothetical protein
INS	553	array20320Short	31211	T	1	0	0	0	1	0	0	0	0.598629	0.638097	0	0	0	0	0	0	0	0	0.620564	0.6615	0.492396	0	0	0	0	0	0	0.306762	0.0752687	0	0	0	0	0	0	blaVEB-1 gene	coding (42/900 nt)	blaVEB-1 cassette
SNP	326	array20320Short	31231	A	0	0	0	0	0	0	1	0	0	0	0	0	0	1	0	0	0	1	0	0	0	0	0	0	0	0	0	0	0.730024	0	0	0	0	0	0	blaVEB-1 gene	snp_nonsense	blaVEB-1 cassette
SNP	1388	array20320Short	31242	G	0	0	1	0	0	0	0	0	0	0	0	0	0	0	0	1	0	0	0	0	0	0	0	0	0	0	0	0	0	0	0	0	0	0	0	blaVEB-1 gene	snp_nonsynonymous	blaVEB-1 cassette
DEL	1809	array20320Short	31273	1	0	0	0	1	0	0	0	0	0	0	0	0	0	0	0	0	0	0	0	0	0	0	0	1	0	0	0	0	0.111313	0	0	0	0	0	0	blaVEB-1 gene	coding (104/900 nt)	blaVEB-1 cassette
INS	554	array20320Short	31217	T	0	0	0	0	0	0	0	0	0.394512	0.357824	0	0	0	0	0	0	0	0	0.359838	0.335918	0.306818	0	0	0	0	0	0	0	0	0	0	0	0	0	0	blaVEB-1 gene	coding (48/900 nt)	blaVEB-1 cassette
SNP	1960	array20320Short	31172	T	0	0	0	0	0	0	0	0	0	0	0	0	0	0	0	0	0	0	0	0	0	0	0	0	0	0	1	0.165787	0	0	0	0	0	0	0	blaVEB-1 gene	snp_nonsynonymous	blaVEB-1 cassette
INS	2253	array20320Short	31180	A	0	0	0	0	0	1	0	0	0	0	0	0	0	0	0	0	0	0	0	0	0	0	0	0	0	0	0	0	0	0	0	0	0	0	0	blaVEB-1 gene	coding (11/900 nt)	blaVEB-1 cassette
DEL	1716	array20320Short	31186	1	0	0	0	0	0	0	0	0	0	0	0	0	0	0	0	0	0	0	0	0	0	1	0	0	0	0	0	0	0	0	0	0	0	0	0	blaVEB-1 gene	coding (17/900 nt)	blaVEB-1 cassette
SNP	843	array20320Short	31266	T	0	0	0	0	0	0	0	0	0	0	0	1	0	0	0	0	0	0	0	0	0	0	0	0	0	0	0	0	0	0	0	0	0	0	0	blaVEB-1 gene	snp_nonsense	blaVEB-1 cassette
INS	1094	array20320Short	31259	A	0	0	0	0	0	0	0	0	0	0	0	0	0	0	0.849701	0	0	0	0	0	0	0	0	0	0	0	0	0.145946	0	0	0	0	0	0	0	blaVEB-1 gene	coding (90/900 nt)	blaVEB-1 cassette
DEL	919	array20320Short	31185	1	0	0	0	0	0	0	0	0	0	0	0	0	0.686237	0	0	0	0	0	0	0	0	0	0	0	0	0	0	0	0	0	0	0	0	0	0	blaVEB-1 gene	coding (16/900 nt)	blaVEB-1 cassette
DEL	918	array20320Short	31181	1	0	0	0	0	0	0	0	0	0	0	0	0	0.304572	0	0	0	0	0	0	0	0	0	0	0	0	0	0	0	0	0	0	0	0	0	0	blaVEB-1 gene	coding (12/900 nt)	blaVEB-1 cassette
DEL	2074	array20320Short	32778	1	0	1	0	0	0	1	0	0	0	0	0	0	0	0	0	0	0	0	0	0	0	0	0	0	0	0	0	0	0	0	0	0	0	0	0	dfrA5/aadB gene	intergenic (+81/-4)	dfrA5 cassette/aadB cassette
DEL	1510	array20320Short	32741	41	0	0	0	0	0	0	0	0	0	0	0	0	0	0	0	0	0	1	0	0	0	0	0	0	0	0	0	0	0	0	0	0	0	0	0	dfrA5/aadB gene	intergenic (+44/-1)	dfrA5 cassette/aadB cassette
SNP	2000	array20320Short	32778	G	1	0	0	0	0	0	0	0	0	0	0	0	0	0	0	0	0	0	0	0	0	0	0	0	0	0	0	0	0	0	0	0	0	0	0	dfrA5/aadB gene	intergenic (+81/-4)	dfrA5 cassette/aadB cassette
SNP	2116	array20320Short	32779	A	0	0	1	0	0	0	0	0	0	0	0	0	0	0	0	0	0	0	0	0	0	0	0	0	0	0	0	0	0	0	0	0	0	0	0	dfrA5/aadB gene	intergenic (+82/-3)	dfrA5 cassette/aadB cassette
DEL	448	array20320Short	31139	1638	0	0	0	0	0	0	0	1	0	0	0	0	0	0	0	0	0	0	0	0	0	0	0	0	1	1	0	0	0	0	0	0	0	0	0	blaVEB-1 geneâ€“dfrA5	blaVEB-1 gene,dfrA5	genes_inactivated=blaVEB-1 gene,dfrA5

## Sheet: breseq mutations (noABcontrol)
Description: this sheet contains all the mutations identified by breseq present in the pooled populations passaged without antibiotic and present at a frequency above 5% in the pooled populations (corresponding to a 30% threshold to detect mutations present in one population)
Type of mutation (SNP = single nucleotide polymorphism, DEL = deletion, INS = insertion)	Unique id for each mutation	Genome where the mutation is found: NC_002516 corresponds to the PA01 chromosome while array20320Short corresponds to the R388:WTA3 or R388:DeltaIntA3 plasmid	Mutation position in the genome	Mutation effect: new nucleotide (SNP), insertion sequence (INS) or size of the deletion (DEL)																																					Effect of the mutation: indicate if mutation is synonymous, non synonymous or non sense (for SNPs) or if in a coding or intergenic region (INS and DEL)
type	id	genome	position	effect	Delta_1	Delta_2	Delta_3	Delta_4	Delta_5	Delta_6	WT_1	WT_2	WT_3	WT_4	WT_5	WT_6	WT_7	WT_8	WT_9	WT_10	WT_11	WT_12	WT_13	WT_14	WT_15	WT_16	WT_17	WT_18	WT_19	WT_20	WT_21	Delta_Control_18MIC	WT_Control_18MIC	Delta_Control_noAB	WT_Control_noAB	Control_Delta_ref	Control_WT_ref	PAO1_ref	PAO1_ref_bis	gene_name	effect	product
SNP	619	NC_002516	1148529	G	0	0	0	0	0	0	0	0	0	0	0	0	0	0	0	0	0	0	0	0	0	0	0	0	0	0	0	0	0	0.131853	0	0	0	0	0	PA1060	snp_nonsynonymous	hypothetical protein
SNP	218	NC_002516	1167290	G	0	0	0	0	0	0	0	0	0	0	0	0	0	0	0	0	0	0	0	0	0	0	0	0	0	0	0	0	0	0.166359	0	0	0	0	0	flgE/flgF	intergenic (+20/-198)	flagellar hook protein FlgE/flagellar basal body rod protein FlgF
SNP	2329	NC_002516	1629949	G	0	0	0	0	0	0	0	0	0	0	0	0	0	0	0	0	0	0	0	0	0	0	0	0	0	0	0	0	0	0	0.0713105	0	0	0	0	PA1500	snp_synonymous	2-hydroxy-3-oxopropionate reductase
SNP	2330	NC_002516	1764136	C	0	0	0	0	0	0	0	0	0	0	0	0	0	0	0	0	0	0	0	0	0	0	0	0	0	0	0	0	0	0	0.0562739	0	0	0	0	PA1620	snp_nonsynonymous	hypothetical protein
SNP	2282	NC_002516	201188	C	0	0	0	0	0	0	0	0	0	0	0	0	0	0	0	0	0	0	0	0	0	0	0	0	0	0	0	0	0	0.155753	0	0	0	0	0	aer2	snp_nonsynonymous	aerotaxis transducer Aer2
SNP	2283	NC_002516	2038120	C	0	0	0	0	0	0	0	0	0	0	0	0	0	0	0	0	0	0	0	0	0	0	0	0	0	0	0	0	0	0.0522575	0	0	0	0	0	PA1874	snp_synonymous	hypothetical protein
SNP	429	NC_002516	2038509	G	0	0	0	0	0	0	0	0	0	0	0	0	0	0	0	0	0	0	0	0	0	0	0	0	0	0	0	0	0	0	0.0573382	0	0	0	0	PA1874	snp_nonsynonymous	hypothetical protein
SNP	734	NC_002516	2038765	C	0	0	0	0	0	0	0	0	0	0	0	0	0	0	0	0	0	0	0	0	0	0	0	0	0	0	0	0	0	0.0918088	0	0	0	0	0	PA1874	snp_synonymous	hypothetical protein
SNP	1852	NC_002516	2038774	C	0	0	0	0	0	0	0	0	0	0	0	0	0	0	0	0	0	0	0	0	0	0	0	0	0	0	0	0	0	0.0691772	0	0	0	0	0	PA1874	snp_synonymous	hypothetical protein
SNP	2331	NC_002516	2039073	G	0	0	0	0	0	0	0	0	0	0	0	0	0	0	0	0	0	0	0	0	0	0	0	0	0	0	0	0	0	0	0.062007	0	0	0	0	PA1874	snp_nonsynonymous	hypothetical protein
SNP	630	NC_002516	2041325	G	0	0	0	0	0	0	0	0	0	0	0	0	0	0	0	0	0	0	0	0	0	0	0	0	0	0	0	0	0	0.0780087	0	0	0	0	0	PA1874	snp_nonsynonymous	hypothetical protein
SNP	1760	NC_002516	2041334	G	0	0	0	0	0	0	0	0	0	0	0	0	0	0	0	0	0	0	0	0	0	0	0	0	0	0	0	0	0	0.0657549	0	0	0	0	0	PA1874	snp_nonsynonymous	hypothetical protein
SNP	2284	NC_002516	2041456	C	0	0	0	0	0	0	0	0	0	0	0	0	0	0	0	0	0	0	0	0	0	0	0	0	0	0	0	0	0	0.0677977	0	0	0	0	0	PA1874	snp_synonymous	hypothetical protein
SNP	539	NC_002516	2041556	G	0	0	0	0	0	0	0	0	0	0	0	0	0	0	0	0	0	0	0	0	0	0	0	0	0	0	0	0	0	0.0899744	0	0	0	0	0	PA1874	snp_nonsynonymous	hypothetical protein
SNP	2332	NC_002516	2084264	A	0	0	0	0	0	0	0	0	0	0	0	0	0	0	0	0	0	0	0	0	0	0	0	0	0	0	0	0	0	0	0.07057	0	0	0	0	femA	snp_nonsynonymous	ferric-mycobactin receptor FemA
SNP	2285	NC_002516	2464941	G	0	0	0	0	0	0	0	0	0	0	0	0	0	0	0	0	0	0	0	0	0	0	0	0	0	0	0	0	0	0.130343	0	0	0	0	0	pslI	snp_nonsynonymous	biofilm formation protein PslI
SNP	833	NC_002516	2689790	C	0	0	0	0	0	0	0	0	0	0	0	0	0	0	0	0	0	0	0	0	0	0	0	0	0	0	0	0	0	0.197433	0	0	0	0	0	PA2406	snp_nonsynonymous	hypothetical protein
SNP	1713	NC_002516	2765225	G	0	0	0	0	0	0	0	0	0	0	0	0	0	0	0	0	0	0	0	0	0	0	0	0	0	0	0	0	0	0	0.126152	0	0	0	0	PA2462	snp_nonsynonymous	hypothetical protein
SNP	1445	NC_002516	2860313	G	0	0	0	0	0	0	0	0	0	0	0	0	0	0	0	0	0	0	0	0	0	0	0	0	0	0	0	0.16441	0	0.20476	0	0	0	0	0	tpx/PA2533	intergenic (-39/+96)	2-Cys peroxiredoxin/sodium:alanine symporter
SNP	2333	NC_002516	3434617	C	0	0	0	0	0	0	0	0	0	0	0	0	0	0	0	0	0	0	0	0	0	0	0	0	0	0	0	0	0	0	0.137056	0	0	0	0	PA3065	snp_nonsynonymous	hypothetical protein
SNP	433	NC_002516	3873916	T	0	0	0	0	0	0	0	0	0	0	0	0	0	0	0	0	0	0	0	0	0	0	0	0	0	0	0	0	0	0	0.0692096	0	0	0	0	PA3463/PA3464	intergenic (+80/+738)	hypothetical protein/hypothetical protein
SNP	2334	NC_002516	4399434	G	0	0	0	0	0	0	0	0	0	0	0	0	0	0	0	0	0	0	0	0	0	0	0	0	0	0	0	0	0.0630894	0	0.0795431	0	0	0	0	PA3924	snp_nonsynonymous	long-chain-fatty-acid--CoA ligase
SNP	2335	NC_002516	4952187	C	0	0	0	0	0	0	0	0	0	0	0	0	0	0	0	0	0	0	0	0	0	0	0	0	0	0	0	0	0	0	0.129645	0	0	0	0	murE	snp_nonsynonymous	UDP-N-acetylmuramoylalanyl-D-glutamate--2, 6-diaminopimelate ligase
SNP	2336	NC_002516	5187395	G	0	0	0	0	0	0	0	0	0	0	0	0	0	0	0	0	0	0	0	0	0	0	0	0	0	0	0	0	0	0	0.138981	0	0	0	0	PA4625	snp_synonymous	hypothetical protein
SNP	2337	NC_002516	5187398	A	0	0	0	0	0	0	0	0	0	0	0	0	0	0	0	0	0	0	0	0	0	0	0	0	0	0	0	0	0	0	0.0886998	0	0	0	0	PA4625	snp_synonymous	hypothetical protein
SNP	1808	NC_002516	5187434	G	0	0	0	0	0	0	0	0	0	0	0	0	0	0	0	0	0	0	0	0	0	0	0	0	0	0	0	0	0	0	0.172625	0	0	0	0	PA4625	snp_synonymous	hypothetical protein
SNP	2338	NC_002516	5187446	A	0	0	0	0	0	0	0	0	0	0	0	0	0	0	0	0	0	0	0	0	0	0	0	0	0	0	0	0	0	0	0.276197	0	0		0	PA4625	snp_synonymous	hypothetical protein
SNP	2339	NC_002516	5572973	G	0	0	0	0	0	0	0	0	0	0	0	0	0	0	0	0	0	0	0	0	0	0	0	0	0	0	0	0	0	0	0.132806	0	0	0	0	parC	snp_nonsynonymous	DNA topoisomerase IV subunit A
SNP	2340	NC_002516	5642939	A	0	0	0	0	0	0	0	0	0	0	0	0	0	0	0	0	0	0	0	0	0	0	0	0	0	0	0	0	0	0	0.0610514	0	0	0	0	PA5017	snp_nonsynonymous	hypothetical protein
SNP	447	NC_002516	5694509	G	0	0	0	0	0	0	0	0	0	0	0	0	0	0	0	0	0	0	0	0	0	0	0	0	0	0	0	0	0	0.173244	0	0	0	0	0	hslU/PA5055	intergenic (+28/-67)	ATP-dependent protease ATP-binding subunit HslU/hypothetical protein
SNP	1005	NC_002516	5915562	G	0	0	0	0	0	0	0	0	0	0	0	0	0	0	0	0	0	0	0	0	0	0	0	0	0	0	0	0	0	0.0652375	0	0	0	0	0	algP	snp_synonymous	alginate regulatory protein AlgP
SNP	917	NC_002516	6171906	C	0	0	0	0	0	0	0	0	0	0	0	0	0	0	0	0	0	0	0	0	0	0	0	0	0	0	0	0	0	0.10512	0	0	0	0	0	gltP/PA5481	intergenic (-396/+317)	glutamate/aspartate:proton symporter/hypothetical protein

## Sheet: breseq mutations (1!8MIC)
Description: this sheet contains all the mutations identified by breseq present in the pooled populations passaged at 1/8 MIC and present at a frequency above 5% in the pooled populations (corresponding to a 30% threshold to detect mutations present in one population)
Type of mutation (SNP = single nucleotide polymorphism, DEL = deletion, INS = insertion)	Unique id for each mutation	Genome where the mutation is found: NC_002516 corresponds to the PA01 chromosome while array20320Short corresponds to the R388:WTA3 or R388:DeltaIntA3 plasmid	Mutation position in the genome	Mutation effect: new nucleotide (SNP), insertion sequence (INS) or size of the deletion (DEL)																																					Effect of the mutation: indicate if mutation is synonymous, non synonymous or non sense (for SNPs) or if in a coding or intergenic region (INS and DEL)
type	id	genome	position	Effect	Delta_1	Delta_2	Delta_3	Delta_4	Delta_5	Delta_6	WT_1	WT_2	WT_3	WT_4	WT_5	WT_6	WT_7	WT_8	WT_9	WT_10	WT_11	WT_12	WT_13	WT_14	WT_15	WT_16	WT_17	WT_18	WT_19	WT_20	WT_21	Delta_Control_18MIC	WT_Control_18MIC	Delta_Control_noAB	WT_Control_noAB	Control_Delta_ref	Control_WT_ref	PAO1_ref	PAO1_ref_bis	gene_name	effect	product
SNP	1710	NC_002516	1148534	C	0	0	0	0	0	0	0	0	0	0	0	0	0	0	0	0	0	0	0	0	0	0	0	0	0	0	0	0.137504	0	0	0	0	0	0	0	PA1060	snp_nonsynonymous	hypothetical protein
SNP	2375	NC_002516	1246799	G	0	0	0	0	0	0	0	0	0	0	0	0	0	0	0	0	0	0	0	0	0	0	0	0	0	0	0	0	0.0619268	0	0	0	0	0	0	imm2/PA1153	intergenic (+871/+1133)	pyocin-S2 immunity protein/hypothetical protein
DEL	621	NC_002516	1408407	3	0	0	0	0	0	0	0	0	0	0	0	0	0	0	0	0	0	0	0	0	0	0	0	0	0	0	0	0	0.119948	0	0	0	0	0	0	PA1297	coding (523-525/981 nt)	metal transporter
SNP	2411	NC_002516	2039449	C	0	0	0	0	0	0	0	0	0	0	0	0	0	0	0	0	0	0	0	0	0	0	0	0	0	0	0	0.0775785	0	0	0	0	0	0	0	PA1874	snp_synonymous	hypothetical protein
SNP	1854	NC_002516	2040563	A	0	0	0	0	0	0	0	0	0	0	0	0	0	0	0	0	0	0	0	0	0	0	0	0	0	0	0	0	0.0521898	0	0	0	0	0	0	PA1874	snp_nonsynonymous	hypothetical protein
SNP	2412	NC_002516	2096413	T	0	0	0	0	0	0	0	0	0	0	0	0	0	0	0	0	0	0	0	0	0	0	0	0	0	0	0	0.135304	0	0	0	0	0	0	0	nrdD/PA1921	intergenic (-57/+101)	anaerobic ribonucleoside triphosphate reductase/hypothetical protein
SNP	634	NC_002516	2526209	G	0	0	0	0	0	0	0	0	0	0	0	0	0	0	0	0	0	0	0	0	0	0	0	0	0	0	0	0.153502	0.198288	0	0	0	0	0	0	PA2296	snp_nonsynonymous	hypothetical protein
SNP	542	NC_002516	2558798	C	0	0	0	0	0	0	0	0	0	0	0	0	0	0	0	0	0	0	0	0	0	0	0	0	0	0	0	0.0633407	0	0	0	0	0	0	0	PA2319/gntR	intergenic (+834/+120)	transposase/GntR family transcriptional regulator
SNP	1445	NC_002516	2860313	G	0	0	0	0	0	0	0	0	0	0	0	0	0	0	0	0	0	0	0	0	0	0	0	0	0	0	0	0.16441	0	0.20476	0	0	0	0	0	tpx/PA2533	intergenic (-39/+96)	2-Cys peroxiredoxin/sodium:alanine symporter
SNP	2413	NC_002516	3843596	C	0	0	0	0	0	0	0	0	0	0	0	0	0	0	0	0	0	0	0	0	0	0	0	0	0	0	0	0.0543199	0	0	0	0	0	0	0	PA3434/PA3435	intergenic (-306/+57)	transposase/flavodoxin
SNP	835	NC_002516	3874450	C	0	0	0	0	0	0	0	0	0	0	0	0	0	0	0	0	0	0	0	0	0	0	0	0	0	0	0	0.0750813	0	0	0	0	0	0	0	PA3463/PA3464	intergenic (+614/+204)	hypothetical protein/hypothetical protein
SNP	1505	NC_002516	4008850	G	0	0	0	0	0	0	0	0	0	0	0	0	0	0	0	0	0	0	0	0	0	0	0	0	0	0	0	0.0516982	0	0	0	0	0	0	0	PA3576/PA3577	intergenic (+292/+88)	hypothetical protein/hypothetical protein
SNP	2334	NC_002516	4399434	G	0	0	0	0	0	0	0	0	0	0	0	0	0	0	0	0	0	0	0	0	0	0	0	0	0	0	0	0	0.0630894	0	0.0795431	0	0	0	0	PA3924	snp_nonsynonymous	long-chain-fatty-acid--CoA ligase
SNP	637	NC_002516	4448871	C	0	0	0	0	0	0	0	0	0	0	0	0	0	0	0	0	0	0	0	0	0	0	0	0	0	0	0	0.119605	0	0	0	0	0	0	0	PA3969a/amn	intergenic (-129/+22)	hypothetical protein/AMP nucleosidase
SNP	2376	NC_002516	5188364	G	0	0	0	0	0	0	0	0	0	0	0	0	0	0	0	0	0	0	0	0	0	0	0	0	0	0	0	0	0.06319	0	0	0	0	0	0	PA4625	snp_synonymous	hypothetical protein
SNP	2377	NC_002516	5188367	A	0	0	0	0	0	0	0	0	0	0	0	0	0	0	0	0	0	0	0	0	0	0	0	0	0	0	0	0	0.0707436	0	0	0	0	0	0	PA4625	snp_synonymous	hypothetical protein
SNP	2378	NC_002516	5189090	A	0	0	0	0	0	0	0	0	0	0	0	0	0	0	0	0	0	0	0	0	0	0	0	0	0	0	0	0	0.0876522	0	0	0	0	0	0	PA4625	snp_synonymous	hypothetical protein
SNP	2414	NC_002516	5466983	A	0	0	0	0	0	0	0	0	0	0	0	0	0	0	0	0	0	0	0	0	0	0	0	0	0	0	0	0.151402	0	0	0	0	0	0	0	PA4869	snp_nonsynonymous	hypothetical protein
SNP	2415	NC_002516	5467288	A	0	0	0	0	0	0	0	0	0	0	0	0	0	0	0	0	0	0	0	0	0	0	0	0	0	0	0	0.180785	0	0	0	0	0	0	0	PA4869	snp_nonsynonymous	hypothetical protein
SNP	1997	NC_002516	5788616	C	0	0	0	0	0	0	0	0	0	0	0	0	0	0	0	0	0	0	0	0	0	0	0	0	0	0	0	0.116179	0	0	0	0	0	0	0	hisF1	snp_nonsynonymous	imidazole glycerol phosphate synthase subunit HisF
INS	2374	NC_002516	785753	CGCTCCCCGCTCCCCGCTCCCCGCTCCCCGCTCCCCGCTCCCCGCTCCCCGCTCCCCGCTCCCCGCTCCCCGCTCCCCGCTCCCCGCTCCCCGCTCCCCGCTCCCCGCTCCCCGCTCCCCGCTCCCCGCTCCCCGCTCCCCGCTCCCCGCTCCC	0	0	0	0	0	0	0	0	0	0	0	0	0	0	0	0	0	0	0	0	0	0	0	0	0	0	0	0	0.11455	0	0	0	0	0	0	phrD/PA0715	intergenic (+183/-216)	PhrD/hypothetical protein
INS	553	array20320Short	31211	T	1	0	0	0	1	0	0	0	0.598629	0.638097	0	0	0	0	0	0	0	0	0.620564	0.6615	0.492396	0	0	0	0	0	0	0.306762	0.0752687	0	0	0	0	0	0	blaVEB-1 gene	coding (42/900 nt)	blaVEB-1 cassette
SNP	326	array20320Short	31231	A	0	0	0	0	0	0	1	0	0	0	0	0	0	1	0	0	0	1	0	0	0	0	0	0	0	0	0	0	0.730024	0	0	0	0	0	0	blaVEB-1 gene	snp_nonsense	blaVEB-1 cassette
DEL	1809	array20320Short	31273	1	0	0	0	1	0	0	0	0	0	0	0	0	0	0	0	0	0	0	0	0	0	0	0	1	0	0	0	0	0.111313	0	0	0	0	0	0	blaVEB-1 gene	coding (104/900 nt)	blaVEB-1 cassette
SNP	1960	array20320Short	31172	T	0	0	0	0	0	0	0	0	0	0	0	0	0	0	0	0	0	0	0	0	0	0	0	0	0	0	1	0.165787	0	0	0	0	0	0	0	blaVEB-1 gene	snp_nonsynonymous	blaVEB-1 cassette
INS	1094	array20320Short	31259	A	0	0	0	0	0	0	0	0	0	0	0	0	0	0	0.849701	0	0	0	0	0	0	0	0	0	0	0	0	0.145946	0	0	0	0	0	0	0	blaVEB-1 gene	coding (90/900 nt)	blaVEB-1 cassette
DEL	2380	array20320Short	31283	1	0	0	0	0	0	0	0	0	0	0	0	0	0	0	0	0	0	0	0	0	0	0	0	0	0	0	0	0	0.0581694	0	0	0	0	0	0	blaVEB-1 gene	coding (114/900 nt)	blaVEB-1 cassette
SNP	2417	array20320Short	31437	T	0	0	0	0	0	0	0	0	0	0	0	0	0	0	0	0	0	0	0	0	0	0	0	0	0	0	0	0.169556	0	0	0	0	0	0	0	blaVEB-1 gene	snp_nonsense	blaVEB-1 cassette
SNP	2418	array20320Short	31848	T	0	0	0	0	0	0	0	0	0	0	0	0	0	0	0	0	0	0	0	0	0	0	0	0	0	0	0	0.17663	0	0	0	0	0	0	0	blaVEB-1 gene	snp_nonsense	blaVEB-1 cassette
SNP	2379	array20320Short	746	A	0	0	0	0	0	0	0	0	0	0	0	0	0	0	0	0	0	0	0	0	0	0	0	0	0		0	0	0.115435	0	0	0	0	0	0	hypothetical protein CDS	snp_nonsynonymous	hypothetical protein
SNP	2416	array20320Short	746	T	0	0	0	0	0	0	0	0	0	0	0	0	0	0	0	0	0	0	0	0	0	0	0	0	0		0	0.163782	0	0	0	0	0	0	0	hypothetical protein CDS	snp_nonsynonymous	hypothetical protein

## Sheet: other mutations
Description: List of mutations and large scale rearrangements unresolved by breseq ( highlighted as 'unassigned junctions') and manually determined
Type of mutation (SNP = single nucleotide polymorphism, DEL = deletion, INS = insertion)	Genome where the mutation is found: NC_002516 corresponds to the PA01 chromosome while array20320Short corresponds to the R388:WTA3 or R388:DeltaIntA3 plasmid	Mutation position in the genome	size of the deletion																																					indicate if mutation is in a coding or intergenic region (INS and DEL)
type	genome	position	effect	Delta_1	Delta_2	Delta_3	Delta_4	Delta_5	Delta_6	WT_1	WT_2	WT_3	WT_4	WT_5	WT_6	WT_7	WT_8	WT_9	WT_10	WT_11	WT_12	WT_13	WT_14	WT_15	WT_16	WT_17	WT_18	WT_19	WT_20	WT_21	Delta_Control_18MIC	WT_Control_18MIC	Delta_Control_noAB	WT_Control_noAB	Control_Delta_ref	Control_WT_ref	PAO1_ref	PAO1_ref_bis	gene_name	effect	product
DEL	NC_002516	726217	13	0	0	0	0	0	0	0	1	0	0	0	0	0	0	0	0	0	0	0	0	0	0	0	0	0	0	0	0	0	0	0	0	0	0	0	PA0668.4	coding	23S ribosomal RNA
DEL	NC_002516	2212868	292	0	0	0	0	0	0	0	0	0	0	0	0	0	0.93	0	0	0	0	0	0	0	0	0	0	0	0	0	0	0	0	0	0	0	0	0	PA2020	coding	transcriptional regulator
DEL	NC_002516	724412	14	0	0	0	0	0	0	0	0	0	0	0	0	0	0	0	0	0	0	0	1	0	0	0	0	0	0	0	0	0	0	0	0	0	0	0	PA0668.4	coding	23S ribosomal RNA
DEL	NC_002516	1692560	3525	0	0	0	0	0	0	0	0	0	0	0	0	0	0	0.9	0	0	0	0	0	0	0	0	0	0	0	0	0	0	0	0	0	0	0	0	ccoN1-ccoN2	cbb3-type cytochrome C oxidase subunit
aadB insertion	array20320Short	31134		0	0	0	0	0	0	1	0	1	1	1	1	1	1	1	1	1	0	1	1	1	0	1	1	0	0	1	0	0	0	0	0	0	0	0	aadB insertion
deletion	array20320Short	31139	1633	0	0	0	0	0	0	0	0	0	0	1	0	0	0	0	0	0	0	0	0.65	0	0	1	0	0	0	0	0	0	0	0	0	0	0	0	blaVEB1/dfrA5 deletion
deletion	array20320Short	31139	62	0	0	0	0	0	0	0	0	0	0	0	0	0	0	0	0	1	0	0	0	0	0	0	0	0	0	0	0	0	0	0	0	0	0	0	dfrA5/aadB	intergenic
deletion	array20320Short	33362	8979	0	0	0	0	0	0	0	0	0	0	0	0	0	0	0	0	0	0	0	0	0	0	0	0	0	1	0	0	0.086	0	0	0	0	0	0	aadB-trwJ	coding
deletion	array20320Short	33362	8621	0	0	0	0	0	0	0	0	0	0	0	0	0	0	0	0	0	0	0	0	0	0	0	0	0	0	0	0	0.293	0	0	0	0	0	0	aadB-trwJ	coding

## Sheet: cassette rearrangements
Description: Cassette rearrangements determination for all populations. Novels junctions between the cassettes and the plasmid backbone were determined by breseq. For each novel junction identified the frequencies of both the ancestral and the novel junctions are indicated
	Junctions determined by breseq						Determined by CNOGpro
	Ancestral sequence			Novel recombinations			Copy number (relatively to the plasmid backbone) - (0.95 - 1.05 confidence interval)			Predicted array
	intI1/blaVEB	dfrA5/aadB	aadB/backbone	intI1/blaVEB -> dfrA5/aadB	aadB/backbone -> intI1/blaVEB1	aadB/backbone -> dfrA5/aadB	blaVEB1	dfrA5	aadB
Junction position	31134/31138	32772/32777	33362	31138 -> 32777	33362 -> 31134	33362 -> 32772
Reference WTA3							0.98 (0.97 - 1.00)	1.15 (1.06 - 1.25)	1.02 (0.98 - 1.07)	ancestral array
Reference DeltaintA3							1.00 (0.96 - 1.04)	1.14 (0.98 - 1.25)	1.04 (1.01 - 1.08)	ancestral array
WT 1	0	1.28	0.99	1.16	1.11		1.07 (0.92 - 1.35)	1.14 (1.07 - 1.21)	2.20 (1.86 - 2.50)	intI1 - aadB - blaVEB - dfrA5 - aadB
WT 2	0	0		1			0.00 (0.00 - 0.00)	0.00 (0.00 - 0.00)	1.19 (1.05 - 1.39)	intI1 - aadB
WT 3	0	0.83	1.17	1.07	0.98		1.09 (0.93 - 1.38)	1.06 (1.00 - 1.12)	2.02 (1.79 - 2.24)	intI1 - aadB - blaVEB - dfrA5 - aadB
WT 4	0	1.27	0.87	1	1.09		1.07 (0.96 - 1.29)	1.12 (1.02 - 1.20)	2.07 (1.84 - 2.31)	intI1 - aadB - blaVEB - dfrA5 - aadB
WT 5	0	0	0.84	0.89		1.08	0.00 (0.00 - 0.00)	0.00 (0.00 - 0.00)	2.19 (1.88 - 2.58)	intI1 - aadB - aadB
WT 6	0	1.17	0.81	1.08	1.11		1.10 (0.95 - 1.39)	1.14 (1.05 - 1.23)	2.03 (1.81 - 2.32)	intI1 - aadB - blaVEB - dfrA5 - aadB
WT 7	0	1.08	0.79	1.06	1.22		1.07 (0.94 - 1.30)	1.07 (0.97 - 1.14)	2.08 (1.85 - 2.27)	intI1 - aadB - blaVEB - dfrA5 - aadB
WT 8	0	1.27	0.84	1.1	1.22		1.04 (0.93 - 1.23)	1.09 (0.97 - 1.21)	2.21 (1.94 - 2.41)	intI1 - aadB - blaVEB - dfrA5 - aadB
WT 9	0	1.19	0.81	1.13	1.03		1.07 (0.93 - 1.31)	1.11 (1.04 - 1.17)	2.04 (1.75 - 2.33)	intI1 - aadB - blaVEB - dfrA5 - aadB
WT 10	0	1.24	0.86	1.01	1.2		1.02 (0.88 - 1.19)	1.10 (0.96 - 1.22)	2.13 (1.92 - 2.39)	intI1 - aadB - blaVEB - dfrA5 - aadB
WT 11	0	1.26	0.86	0.88	1.2		0.91 (0.76 - 1.01)	1.11 (0.97 - 1.26)	2.13 (1.91 - 2.33)	intI1 - aadB - blaVEB - dfrA5 - aadB
WT 12							0.98 (0.97 - 1.00)	1.13 (1.02 - 1.23)	1.31 (1.10 - 1.67)	ancestral array
WT 13	0	1.22	0.81	1.03	1.08		1.06 (0.94 - 1.26)	1.07 (0.96 - 1.18)	2.08 (1.82 - 2.31)	intI1 - aadB - blaVEB - dfrA5 - aadB
WT 14	0	0.35	1.02	1.17	0.33	0.76	1.15 (0.93 - 1.56) or 0.4 ??	0.47 (0.32 - 0.66)	2.29 (1.94 - 2.68)	intI1 - aadB - blaVEB - dfrA5 - aadB + intI1 - aadB - aaB
WT 15	0	1.19	0.71	1.3	1.11		1.05 (0.93 - 1.27)	1.12 (0.99 - 1.24)	2.11 (1.85 - 2.35)	intI1 - aadB - blaVEB - dfrA5 - aadB
WT 16							1.00 (0.97 - 1.03)	1.12 (0.97 - 1.27)	1.02 (0.94 - 1.11)	ancestral array
WT 17	0	0	0.91	1		0.91	0.00 (0.00 - 0.00)	0.00 (0.00 - 0.00)	2.26 (1.91 - 2.73)	intI1 - aadB - aadB
WT 18	0	1.14	0.84	0.93	1.2		1.04 (0.92 - 1.25)	1.10 (0.95 - 1.26)	2.09 (1.87 - 2.30)	intI1 - aadB - blaVEB - dfrA5 - aadB
WT 19	0	0		1.13			0.00 (0.00 - 0.00)	0.00 (0.00 - 0.00)	1.21 (1.05 - 1.43)	intI1 - aadB
WT 20	0	0		1.1			0.00 (0.00 - 0.00)	0.00 (0.00 - 0.00)	1.58 (1.26 - 1.91)	intI1 - aadB
WT 21	0	1.16	0.86	1.04	1.01		1.10 (0.96 - 1.37)	1.04 (1.01 - 1.08)	2.00 (1.74 - 2.23)	intI1 - aadB - blaVEB - dfrA5 - aadB
Delta 1							1.00 (0.99 - 1.02)	1.08 (0.99 - 1.18)	1.02 (0.97 - 1.07)	ancestral array
Delta 2							1.02 (0.99 - 1.04)	1.15 (1.02 - 1.31)	1.05 (0.99 - 1.13)	ancestral array
Delta 3							1.00 (0.99 - 1.03)	1.11 (0.99 - 1.23)	0.99 (0.96 - 1.04)	ancestral array
Delta 4							1.00 (0.96 - 1.03)	1.14 (1.03 - 1.24)	1.04 (0.97 - 1.14)	ancestral array
Delta 5							1.01 (0.98 - 1.04)	1.16 (1.02 - 1.27)	1.04 (1.00 - 1.09)	ancestral array
Delta 6							1.00 (0.97 - 1.03)	1.15 (0.98 - 1.29)	1.05 (1.00 - 1.12)	ancestral array
WT 1/8							1.02 (1.00 - 1.05)	1.22 (1.04 - 1.44)	1.18 (1.09 - 1.25)	ancestral array
Delta 1/8							1.01 (0.99 - 1.04)	1.09 (0.96 - 1.21)	1.04 (0.99 - 1.09)	ancestral array
WT no AB							0	0	0	no plasmid
Delta no AB							0	0	0	no plasmid

## Sheet: coverage
Description: Depth of coverage for both plasmid and chromosome for each sample, as determined by breseq.
Sample	Coverage plasmid	Coverage chromosome
Reference WTA3	756.4	137.8
Reference DeltaintA3	1321	205
WT 1	1398.7	172.1
WT 2	481	153.2
WT 3	719.8	165.7
WT 4	657.6	170
WT 5	579.1	155.2
WT 6	656.9	170.3
WT 7	682.9	152.3
WT 8	836.3	167
WT 9	1011	166
WT 10	178	157.5
WT 11	326	160
WT 12	1490	172
WT 13	739.7	187.6
WT 14	1165	166
WT 15	398.6	160.8
WT 16	241	173
WT 17	651.4	181.6
WT 18	490	149.5
WT 19	887.6	123.3
WT 20	823.5	158.6
WT 21	758.4	174.2
Delta 1	698.5	119.6
Delta 2	525.7	200.5
Delta 3	458.9	177.2
Delta 4	203	180
Delta 5	656.2	135.6
Delta 6	604.7	143.2
WT 1/8	0	126.6
Delta 1/8	0	136.1
WT no AB	675.1	143.7
Delta no AB	983.2	173.3
