# Supplementary material for: Integron activity accelerates the evolution of antibiotic resistance
Source: eLife. 2021 Feb 26;10:e62474. doi: 10.7554/eLife.62474 (PMC8024014; doi:10.7554/eLife.62474)
Supplement: Supplementary file 3. [file elife-62474-supp3.xlsx]

## Sheet: breseq mutations (ramping)
Description: this sheet contains all the mutations identified by breseq present in the populations at a frequency above 30% from the ramping treatment at x4MIC. Mutations are listed by genome (chromosome then plasmid) and gene mutations frequency (with most mutated genes found at the top)
Type of mutation (SNP = single nucleotide polymorphism, DEL = deletion, INS = insertion)	Unique id for each mutation	Genome where the mutation is found: NC_002516 corresponds to the PA01 chromosome while array20320Short corresponds to the R388:WTA3 or R388:DeltaIntA3 plasmid	Mutation position in the genome	Mutation effect: new nucleotide (SNP), insertion sequence (INS) or size of the deletion (DEL)																																					Effect of the mutation: indicate if mutation is synonymous, non synonymous or non sense (for SNPs) or if in a coding or intergenic region (INS and DEL)
type	id	genome	position	effect	Delta_1	Delta_2	Delta_3	Delta_4	Delta_5	Delta_6	Delta_7	Delta_8	Delta_9	Delta_10	Delta_11	Delta_12	Delta_13	Delta_14	Delta_15	Delta_16	Delta_17	Delta_18	Delta_19	Delta_20	Delta_21	Delta_22	WT_1	WT_2	WT_3	WT_4	WT_5	WT_6	WT_7	WT_8	WT_9	WT_10	WT_11	WT_12	WT_13	WT_14	WT_15	WT_16	WT_17	WT_18	WT_19	WT_20	WT_21	WT_22	WT_23
SNP	703	NC_002516	5091142	C	0	0	0	0	0	0	0	0	0	0	0	0	0	0	1	0	0	0	0	0	0	0	0	0	0	0	0	0	0	0	0	0	0	0	0	0	0	0	0	0	0	0	0	0	0
INS	1185	NC_002516	5091163	G	0	0	0	0	0	0	0	0	0	0	0	0	0	0	0	0	0	0	0	0	1	0	0	0	0	0	0	0	0	0	0	0	0	0	0	0	0	0	0	0	0	0	0	0	0
SNP	1970	NC_002516	5091581	A	0	0	0	0	0	0	0	0	0	0	0	0	0	0	0	0	0	0	0	0	0	0	0	0	0	0	0	0	0	0	0	0	0	0	0	0	1	0	0	0	0	0	0	0	0
INS	1445	NC_002516	5091111	A	0	0	0	0	0	0	0	0	0	0	0	0	0	0	0	0	0	0	0	0	0	0	0.880002	0	0	0	0	0	0	0	0	0	0	0	0	0	0	0	0	0	0	0	0	0	0
SNP	2403	NC_002516	2906123	A	0	0	0	0	0	1	0	0	0	0	0	0	0	0	0	0	0	0	0	0	0	0	0	0	0	0	0	0	0	0	0	0	0	0	0	0	0	0	0	0	0	0	0	0	0
SNP	530	NC_002516	2906109	C	0	0	0	0	0.766933	0	0	0	0	0	0	0	0.173028	0	0	0	0	0	0	0	0	0	0	0	0	0	0	0	0	0	0	0	0	0	0	0	0	0	0	0	0	0	0	0	0
SNP	615	NC_002516	4768227	C	0	0.818199	0	0	0	0	0	0	0	0.723372	0	0	0	0.196915	0	0	0	0	0	0	0	0	0	0	0	0	0	0	0	0	0	0	0	0	0	0	0	0	0	0	0	0	0	0	0
SNP	614	NC_002516	4767839	A	0	0	0	0	0	0	0	0	0	0	0	0	0	0.136943	0	0	0	0	0	0	0	0	0	0	0	0	0	0	0	0	0.695327	0	0	0	0	0	0	0	0	0	0	0	0	0	0
SNP	767	NC_002516	4962241	G	0	0	0	0.286535	0	0	0	0	0	0	0	0	0	0	0	0.356926	0	0	0	0	0	0.242421	0.32289	0	0	0.315796	0	0	0	0	0	0	0	0	0	0	0	0	0	0.345995	0	0	0	0	0
DEL	1184	NC_002516	2989872	2	0	0	0	0	0	0	0	0	0	0	0	0	0	0	0	0	0	0	0	0	1	0	0	0	0	0	0	0	0	0	0	0	0	0	0	0	0	0	0	0	0	0	0	0	0
INS	2086	NC_002516	2213159	TAT	0	0	0	0	0	0	0	0	0	0	0	0	0	0	0	0	0	0	0	0	0	0	0	0	0	0	0	0	0	0	0	0	0	0	0	0	0	0	0	0	0	0.928655	0	0	0
SNP	886	NC_002516	2213182	A	0	0	0	0	0	0	0	0	0	0	0	0	0	0	0	0	0	0.84653	0	0	0	0	0	0	0	0	0	0	0	0	0	0	0	0	0	0	0	0	0	0	0	0	0	0	0
SNP	2433	NC_002516	2212809	T	0	0	0	0	0	0	0.364778	0	0	0	0	0	0	0	0	0	0	0	0	0	0	0	0	0	0	0	0	0	0	0	0	0	0	0	0	0	0	0	0	0	0	0	0	0	0
SNP	2319	NC_002516	1731788	T	0	0	1	0	0	0	0	0	0	0	0	0	0	0	0	0	0	0	0	0	0	0	0	0	0	0	0	0	0	0	0	0	0	0	0	0	0	0	0	0	0	0	0	0	0
INS	1489	NC_002516	1844903	GTTGGC	0	0	0	0	0	0	0	0	0	0	0	0	0	0	0	0	0	0	0	0	0	0	0	1	0	0	0	0	0	0	0	0	0	0	0	0	0	0	0	0	0	0	0	0	0
SNP	943	NC_002516	1951271	G	0	0	0	0	0	0	0	0	0	0	0	0	0	0	0	0	0	0	1	0	0	0	0	0	0	0	0	0	0	0	0	0	0	0	0	0	0	0	0	0	0	0	0	0	0
SNP	449	NC_002516	3834101	T	0	0	0	0	0	0	0	0	0	0	0	1	0	0	0	0	0	0	0	0	0	0	0	0	0	0	0	0	0	0	0	0	0	0	0	0	0	0	0	0	0	0	0	0	0
SNP	2517	NC_002516	5328724	A	0	0	0	0	0	0	0	0	1	0	0	0	0	0	0	0	0	0	0	0	0	0	0	0	0	0	0	0	0	0	0	0	0	0	0	0	0	0	0	0	0	0	0	0	0
SNP	1963	NC_002516	1950755	A	0	0	0	0	0	0	0	0	0	0	0	0	0	0	0	0	0	0	0	0	0	0	0	0	0	0	0	0	0	0	0	0	0	0	0	0	0.574409	0	0	0	0	0	0	0	0
INS	1676	NC_002516	5549417	C	0	0	0	0.0617261	0	0	0	0	0	0	0	0	0	0	0	0	0	0	0	0	0	0	0	0	0	0	0	1	0	0	0	0	0	0	0	0	0	0	0	0	0	0	0	0	0
DEL	1834	NC_002516	5549418	1	0	0	0	0	0	0	0	0	0	0	0	0	0	0	0	0	0	0	0	0	0	0	0	0	0	0	0	0	0	0	0	0	1	0	0	0	0	0	0	0	0	0	0	0	0
SNP	2349	NC_002516	5549083	A	0	0	0	0.893534	0	0	0	0	0	0	0	0	0	0	0	0	0	0	0	0	0	0	0	0	0	0	0	0	0	0	0	0	0	0	0	0	0	0	0	0	0	0	0	0	0
SNP	2256	NC_002516	1691011	A	0.942501	0	0	0	0	0	0	0	0	0	0	0	0	0	0	0	0	0	0	0	0	0	0	0	0	0	0	0	0	0	0	0	0	0	0	0	0	0	0	0	0	0	0	0	0
SNP	537	NC_002516	5311881	C	0	0	0	0	0	0	0	0	0	0.127923	0	0	0.601978	0	0	0	0	0	0	0	0	0	0	0	0	0	0	0	0	0	0	0	0	0	0	0	0	0	0	0	0	0	0	0	0
SNP	887	NC_002516	2985030	A	0	0	0	0	0	0	0	0	0	0	0	0	0	0	0	0	0	0.892549	0	0	0	0	0	0	0	0	0	0	0	0	0	0	0	0	0	0	0	0	0	0	0	0	0	0	0
DEL	2291	NC_002516	3563610	18	0	0.866404	0	0	0	0	0	0	0	0	0	0	0	0	0	0	0	0	0	0	0	0	0	0	0	0	0	0	0	0	0	0	0	0	0	0	0	0	0	0	0	0	0	0	0
DEL	2396	NC_002516	1602835	11	0	0	0	0	0	0.761905	0	0	0	0	0	0	0	0	0	0	0	0	0	0	0	0	0	0	0	0	0	0	0	0	0	0	0	0	0	0	0	0	0	0	0	0	0	0	0
SNP	2533	NC_002516	5115994	A	0	0	0	0	0	0	0	0	0	0.681003	0	0	0	0	0	0	0	0	0	0	0	0	0	0	0	0	0	0	0	0	0	0	0	0	0	0	0	0	0	0	0	0	0	0	0
SNP	261	NC_002516	4258565	A	0	0	0	0	0	0	0	0	0	0	0.668576	0	0	0	0	0	0	0	0	0	0	0	0	0	0	0	0	0	0	0	0	0	0	0	0	0	0	0	0	0	0	0	0	0	0
INS	1530	NC_002516	2735109	CGTGAT	0	0	0	0	0	0	0	0	0	0	0	0	0	0	0	0	0	0	0	0	0	0	0	0	0.647899	0	0	0	0	0	0	0	0	0	0	0	0	0	0	0	0	0	0	0	0
SNP	2406	NC_002516	4771991	C	0	0	0	0	0	0.579148	0	0	0	0	0	0	0	0	0	0	0	0	0	0	0	0	0	0	0	0	0	0	0	0	0	0	0	0	0	0	0	0	0	0	0	0	0	0	0
SNP	613	NC_002516	4762509	G	0	0	0	0	0	0	0	0	0	0	0	0	0	0.367902	0	0	0	0	0	0	0	0	0	0	0	0	0	0	0	0	0	0	0	0	0	0	0	0	0	0	0	0	0	0	0
DEL	1897	NC_002516	4758963	6	0	0	0	0	0	0	0	0	0	0	0	0	0	0	0	0	0	0	0	0	0	0	0	0	0	0	0	0	0	0	0	0	0	0	0.575419	0	0	0	0	0	0	0	0	0	0
SNP	1780	NC_002516	4785418	A	0	0	0	0	0	0	0	0	0	0	0	0	0	0	0	0	0	0	0	0	0	0	0	0	0	0	0	0	0	0	0.539367	0	0	0	0	0	0	0	0	0	0	0	0	0	0
INS	2027	NC_002516	5852255	CATCTG	0	0	0	0	0	0	0	0	0	0	0	0	0	0	0	0	0	0	0	0	0	0	0	0	0	0	0	0	0	0	0	0	0	0	0	0	0	0	0.408559	0	0	0	0	0	0
INS	455	array20320Short	31211	T	0	0	0	0	0	0	0.264085	0	1	0	0	1	0	0	0	0	0	1	1	1	1	0	0	0	0	0.229261	0	0	0	0.695776	0	0	0	0	0.945428	0	0	0	0.4063	0	0.615379	0	0	0	0
SNP	770	array20320Short	31231	A	0	0	0	0	0	0	0	0	0	0	0	0	0	0	0	1	0	0	0	0	0	0.665664	1	0	1	0	0	0	1	0	0.198111	0	0	0	0	1	0	0	0	0	0	1	1	0	0
INS	331	array20320Short	31440	A	0	0	1	0	0	0	0	0	0	0	1	0	0	0	1	0	0	0	0	0	0	0	0	0	0	0	0	0	0	0	0	0	0	0	0	0	0	0	0	1	0	0	0	0	0
DEL	541	array20320Short	31283	1	0	0	0	0	0	0	0.701851	0	0	0	0	0	0.831933	0	0	0	0	0	0	0	0	0	0	0	0	0	0.941003	0	0	0	0	0	0	0	0	0	0	0	0	0	0	0	0	0	0
SNP	1496	array20320Short	31242	G	0	0	0	0	1	0	0	0	0	0	0	0	0	0	0	0	0	0	0	0	0	0	0	1	0	0	0	0	0	0	0	0	0	0	0	0	0	0	0	0	0	0	0	0	0
DEL	1972	array20320Short	31430	11	0	1	0	0	0	0	0	0	0	0	0	0	0	0	0	0	0	0	0	0	0	0	0	0	0	0	0	0	0	0	0	0	0	0	0	0	1	0	0	0	0	0	0	0	0
SNP	1782	array20320Short	31266	T	0	0	0	0	0	0	0	0	0	0	0	0	0	0	0	0	0	0	0	0	0	0	0	0	0	0	0	0	0	0	0.0813966	0	0	1	0	0	0	0	0	0	0	0	0	0	0
SNP	1143	array20320Short	31172	A	0	0	0	0	0	0	0	0	0	0	0	0	0	0	0	0	0	0	0	0	0	0	0	0	0	0	0	0	0	0	0	0	0	0	0	0	0	0	0	0	0	0	0	1	0
SNP	2182	array20320Short	31172	T	0	0	0	0	0	0	0	0	0	0	0	0	0	0	0	0	0	0	0	0	0	0	0	0	0	0	0	0	0	0	0	0	0	0	0	0	0	0	0	0	0	0	0	0	1
SNP	2206	array20320Short	31211	T	0	0	0	0	0	0	0	0	0	0	0	0	0	0	0	0	0	0	0	0	0	0	0	0	0	0	0	0	0	0	0	0	0	0	0	0	0	0	0	0	0	0	0	0	0
DEL	2260	array20320Short	31340	11	1	0	0	0	0	0	0	0	0	0	0	0	0	0	0	0	0	0	0	0	0	0	0	0	0	0	0	0	0	0	0	0	0	0	0	0	0	0	0	0	0	0	0	0	0
SNP	2535	array20320Short	31437	T	0	0	0	0	0	0	0	0	0	1	0	0	0	0	0	0	0	0	0	0	0	0	0	0	0	0	0	0	0	0	0	0	0	0	0	0	0	0	0	0	0	0	0	0	0
INS	1497	array20320Short	31778	A	0	0	0	0	0	0	0	0	0	0	0	0	0	0	0	0	0	0	0	0	0	0	0	1	0	0	0	0	0	0	0	0	0	0	0	0	0	0	0	0	0	0	0	0	0
SNP	1566	array20320Short	31239	T	0	0	0	0	0	0	0	0	0	0	0	0	0	0	0	0	0	0	0	0	0	0	0	0	0	0.76761	0	0	0	0	0	0	0	0	0	0	0	0	0	0	0	0	0	0	0
INS	2205	array20320Short	31207	T	0	0	0	0	0	0	0	0	0	0	0	0	0	0	0	0	0	0	0	0	0	0	0	0	0	0	0	0	0	0	0	0	0	0	0	0	0	0	0	0	0	0	0	0	0
DEL	1805	array20320Short	31185	1	0	0	0	0	0	0	0	0	0	0	0	0	0	0	0	0	0	0	0	0	0	0	0	0	0	0	0	0	0	0	0	0.644756	0	0	0	0	0	0	0	0	0	0	0	0	0
DEL	2029	array20320Short	31186	1	0	0	0	0	0	0	0	0	0	0	0	0	0	0	0	0	0	0	0	0	0	0	0	0	0	0	0	0	0	0	0	0	0	0	0	0	0	0	0.533459	0	0	0	0	0	0
INS	1742	array20320Short	31217	T	0	0	0	0	0	0	0	0	0	0	0	0	0	0	0	0	0	0	0	0	0	0	0	0	0	0	0	0	0	0.0861812	0	0	0	0	0	0	0	0	0	0	0.37729	0	0	0	0
DEL	1804	array20320Short	31181	1	0	0	0	0	0	0	0	0	0	0	0	0	0	0	0	0	0	0	0	0	0	0	0	0	0	0	0	0	0	0	0	0.345831	0	0	0	0	0	0	0	0	0	0	0	0	0
INS	616	array20320Short	31167	ATATGAA	0	0	0	0	0	0	0	0	0	0	0	0	0	1	0	0	0	0	0	0	0	0	0	0	0	0	0	0	0	0	0	0	0	0	0	0	0	0	0	0	0	0	0	0	0
DEL	1937	array20320Short	32741	41	0	0	0	0	0	0	0	0	0	0	0	0	0	0	0	0	0	0	0	0	0	0	0	0	0	0	0	0	0	0	0	0	0	0	0	1	0	0	0	0	0	0	0	0	0
SNP	2381	array20320Short	32779	A	0	0	0	0	0.67016	0	0	0	0	0	0	0	0	0	0	0	0	0	0	0	0	0	0	0	0	0	0	0	0	0	0	0	0	0	0	0	0	0	0	0	0	0	0	0	0
DEL	2002	array20320Short	31139	1638	0	0	0	0	0	0	0	0	0	0	0	0	0	0	0	0	0	0	0	0	0	0	0	0	0	0	0	0	0	0	0	0	0	0	0	0	0	1	0	0	0	0	0	0	0
[truncated: 8 more columns]

## Sheet: other mutations
Description: List of mutations and large scale rearrangements unresolved by breseq (highlighted as 'unassigned junctions') and manually determined by examining the junctions
type	id	genome	position	effect	Delta_1	Delta_2	Delta_3	Delta_4	Delta_5	Delta_6	Delta_7	Delta_8	Delta_9	Delta_10	Delta_11	Delta_12	Delta_13	Delta_14	Delta_15	Delta_16	Delta_17	Delta_18	Delta_19	Delta_20	Delta_21	Delta_22	WT_1	WT_2	WT_3	WT_4	WT_5	WT_6	WT_7	WT_8	WT_9	WT_10	WT_11	WT_12	WT_13	WT_14	WT_15	WT_16	WT_17	WT_18	WT_19	WT_20	WT_21	WT_22	WT_23
DEL		array20320Short	31134	1643	0	0	0	0	0	0	0	0	0	0	0	0	0	0	0	0	0	0	0	0	0	0	0	0	0.3	0	0.5	0	0.7	0	0	0	0	0	0	0	0	0	0	0	0.3	0.8	0.5	0	0
DEL		NC_002516	724470	5	0	0	0	0	0.4	0	0	0	0	0	0	0	0	0	0	0	0	0	0	0	0	0	0	0	0	0	0	0	0	0	0	0	0	0	0	0	0	0	0	0	0	0	0	0	0
DEL		NC_002516	726019	46	0	0	0	0	0	0	0	0	0	1	0	0	0	0	0	0	0	0	0	0	0	0	0	0	0	0	0	0	0	0	0	0	0	0	0	0	0	0	0	0	0	0	0	0	0
DEL		NC_002516	725416	983	0	0	0	0	0	0	0	0	0	0	0	0	0	0	0	0	0	0	1	0	0	0	0	0	0	0	0	0	0	0	0	0	0	0	0	0	0	0	0	0	0	0	0	0	0
DEL		NC_002516	726217	13	0	0	0	0	0	0	0	0	0	0	0	0	0	0	0	0	0	0	0	0	0	0	0	0	0	0	1	0	0	0	0	0	0	0	0	0	0	0	0	0	0	0	0	0	0
[truncated: 8 more columns]

## Sheet: cassettes rearrangements
Description: Cassette rearrangements determination for all populations. Novels junctions between the cassettes and the plasmid backbone were determined by breseq. For each novel junction identified the frequencies of both the ancestral and the novel junctions are indicated
	Ancestral junctions (relative junction coverage )				Novel recombinations (relative junction coverage )			Copy number (CNOGpro)			Proposed array
	intI1/blaVEB1	dfrA5/aadB	aadB/backbone	intI1/blaVEB -> dfrA5/aadB	aadB/backbone -> intI1/blaVEB1	aadB/backbone -> dfrA5/aadB	dfrA5/aadB -> aadB/backbone	blaVEB1	dfrA5	aadB
Junction position	31134/31138	32772/32777	33362	31138 -> 32777	33362 -> 31134	33362 -> 32772	32772 -> 33362
Delta 1								1.11 (0.93 - 1.43)	1.19 (1.12 - 1.26)	1.02 (0.94 - 1.09)	ancestral array
Delta 2								1.13 (0.94 - 1.48)	1.13 (1.07 - 1.19)	0.99 (0.92 - 1.06)	ancestral array
Delta 3								1.12 (1.05 - 1.18)	1.21 (1.14 - 1.28)	1.04 (0.94 - 1.14)	ancestral array
Delta 4								1.14 (1.10 - 1.19)	1.20 (1.13 - 1.27)	1.11 (1.04 - 1.18)	ancestral array
Delta 5								1.16 (1.11 - 1.21)	1.22 (1.14 - 1.29)	1.02 (0.96 - 1.08)	ancestral array
Delta 6								0.76 (0.70 - 0.82)	1.06 (0.99 - 1.14)	1.03 (0.97 - 1.09)	ancestral array
Delta 7								0.93 (0.88 - 0.97)	1.16 (1.10 - 1.23)	0.99 (0.93 - 1.04)	ancestral array
Delta 8								1.04 (1.01 - 1.08)	1.22 (1.14 - 1.29)	1.09 (1.02 - 1.16)	ancestral array
Delta 9								1.09 (1.05 - 1.13)	1.22 (1.14 - 1.31)	0.97 (0.91 - 1.04)	ancestral array
Delta 10								1.07 (1.03 - 1.12)	1.20 (1.13 - 1.27)	1.00 (0.94 - 1.05)	ancestral array
Delta 11								1.28 (1.21 - 1.34)	1.28 (1.19 - 1.39)	1.03 (0.97 - 1.10)	ancestral array
Delta 12								1.16 (1.11 - 1.20)	1.17 (1.12 - 1.23)	1.03 (0.96 - 1.10)	ancestral array
Delta 13								0.79 (0.74 - 0.84)	1.14 (1.05 - 1.25)	1.00 (0.94 - 1.07)	ancestral array
Delta 14								0.97 (0.81 - 1.30)	1.11 (1.05 - 1.16)	1.02 (0.96 - 1.08)	ancestral array
Delta 15								0.95 (0.90 - 1.00)	1.17 (1.12 - 1.24)	0.99 (0.91 - 1.07)	ancestral array
Delta 16								1.10 (1.06 - 1.15)	1.19 (1.13 - 1.24)	1.03 (0.96 - 1.10)	ancestral array
Delta 17								1.25 (1.19 - 1.31)	1.24 (1.15 - 1.33)	1.01 (0.93 - 1.08)	ancestral array
Delta 18								1.16 (1.11 - 1.22)	1.22 (1.15 - 1.30)	1.03 (0.97 - 1.09)	ancestral array
Delta 19								1.08 (1.03 - 1.13)	1.17 (1.11 - 1.24)	1.04 (0.99 - 1.10)	ancestral array
Delta 20								1.06 (1.02 - 1.10)	1.21 (1.13 - 1.29)	1.08 (1.02 - 1.13)	ancestral array
Delta 21								1.11 (1.07 - 1.16)	1.24 (1.17 - 1.32)	0.97 (0.91 - 1.05)	ancestral array
Delta 22								0.92 (0.86 - 0.97)	1.16 (1.10 - 1.22)	1.04 (0.97 - 1.11)	ancestral array
WT 1								1.06 (1.02 - 1.10)	1.27 (1.19 - 1.36)	1.06 (0.99 - 1.14)	ancestral array
WT 2	0	1.11	0.86	0.99	1.07	0.06		1.10 (1.05 - 1.15)	1.05 (0.98 - 1.12)	2.01 (1.90 - 2.11)	intI1 - aadB - dfrA5 - blaVEB - aadB
WT 3	0	0.6	0.89	1.02	0.6			0.77 (0.73 - 0.81)	0.66 (0.62 - 0.71)	1.64 (1.54 - 1.74)	intI1 - aadB - dfrA5 - blaVEB - aadB + intI1 - aadB
WT 4								1.10 (1.04 - 1.16)	1.19 (1.11 - 1.27)	0.97 (0.92 - 1.04)	ancestral array
WT 5	0.02	0.4	0.9	1.02	0.35	0.41		0.61 (0.54 - 0.67)	0.44 (0.40 - 0.49)	1.85 (1.71 - 2.03)	intI1 - aadB - dfrA5 - blaVEB - aadB + intI1 - aadB - aadB
WT 6								1.16 (1.10 - 1.21)	1.14 (1.07 - 1.21)	0.95 (0.88 - 1.03)	ancestral array
WT 7	0	0.23	0.9	1.1	0.2			0.44 (0.35 - 0.53)	0.25 (0.21 - 0.32)	1.28 (1.10 - 1.56)	intI1 - aadB - dfrA5 - blaVEB - aadB + intI1 - aadB
WT 8	0.88	1.22	0.88	0.25	0.25			1.00 (0.96 - 1.05)	1.14 (1.07 - 1.21)	1.27 (1.20 - 1.35)	ancestral array + intI1 - aadB - dfrA5 - blaVEB - aadB
WT 9	0.98	1.19	0.89	0.34	0.38			1.24 (1.18 - 1.30)	1.21 (1.13 - 1.30)	1.30 (1.24 - 1.36)	ancestral array + intI1 - aadB - dfrA5 - blaVEB - aadB
WT 10	0	1.16	0.82	1.01	1.14			1.17 (1.11 - 1.22)	1.13 (1.06 - 1.21)	2.04 (1.93 - 2.16)	int1 - aadB - blaVEB - dfrA- aadB
WT 11		1.24	0.84			0.9		1.07 (1.02 - 1.11)	1.19 (1.15 - 1.24)	1.97 (1.84 - 2.10)	int1- blaVEB - dfrA - aadB - addB
WT 12	0.19	1.13	0.86	0.15	0.19	0.78		1.11 (1.06 - 1.16)	1.15 (1.06 - 1.22)	1.97 (1.86 - 2.09)	ambiguous
WT 13		1.22	0.92			0.67		1.00 (0.96 - 1.05)	1.14 (1.09 - 1.19)	1.76 (1.64 - 1.86)	ancestral array + int1 - blaVEB - dfrA - aadB - aadB
WT 14								1.08 (1.04 - 1.13)	1.13 (1.07 - 1.19)	1.33 (0.97 - 1.99)	ancestal array
WT 15								1.31 (1.07 - 1.73)	1.23 (1.15 - 1.32)	1.06 (1.00 - 1.13)	ancestral array
WT 16		0	0.9			0.08		0.00 (0.00 - 0.00)	0.00 (0.00 - 0.00)	1.11 (1.00 - 1.19)	int1 - aadB + int1 - aadB - aadB
WT 17								1.20 (1.14 - 1.25)	1.13 (1.07 - 1.19)	1.01 (0.95 - 1.07)	ancestral array
WT 18	0.01	0.19	0.87	1.06	0.19	0.52	0.06	0.45 (0.36 - 0.54)	0.27 (0.23 - 0.34)	1.96 (1.69 - 2.40)	int1 - aadB - blaVEB - dfrA - aadB + int1 - aadB - aadB
WT 19	0	0.69	0.91	1.01	0.59	0.35		0.72 (0.69 - 0.76)	0.64 (0.60 - 0.67)	1.96 (1.84 - 2.08)	int1 - aadB - blaVEB - dfrA - aadB + int1 - aadB - aadB
WT 20	0	0.05	0.85	1.06	0.05			0.29 (0.17 - 0.42)	0.08 (0.05 - 0.12)	1.85 (0.92 - 3.66)	int1 - aadB - blaVEB - dfrA - aadB + int1 - aadB
WT 21	0.01	0.51	0.84	1.05	0.52		0.04	0.62 (0.56 - 0.68)	0.57 (0.52 - 0.62)	1.51 (1.38 - 1.67)	int1 - aadB - blaVEB - dfrA - aadB + int1 - aadB
WT 22	0	1.26	0.89	1.04	1.11	0.19		1.01 (0.97 - 1.05)	1.17 (1.10 - 1.25)	2.27 (2.15 - 2.39)	ambiguous
WT 23	0.03	1.18	0.82	0.96	1.08			1.02 (0.97 - 1.06)	1.12 (1.05 - 1.20)	1.99 (1.88 - 2.09)	int1 - aadB - blaVEB - dfrA- aadB
WT 24								1.03 (0.97 - 1.08)	1.19 (1.12 - 1.25)	1.01 (0.94 - 1.07)	ancestral array

## Sheet: coverage
Description: Depth of coverage for both plasmid and chromosome for each sample, as determined by breseq.
Sample	Coverage plasmid	Coverage chromosome
Delta 1	811.4	185.3
Delta 2	579.6	167.9
Delta 3	379.4	147.4
Delta 4	763.2	139.2
Delta 5	1082.1	169.7
Delta 6	1098.4	176.4
Delta 7	598.5	170
Delta 8	747.8	222.6
Delta 9	827.4	200.7
Delta 10	657.3	156.9
Delta 11	923.6	171.5
Delta 12	827.7	154
Delta 13	637.8	201.4
Delta 14	566.2	212.2
Delta 15	653.2	206.1
Delta 16	660.6	183.1
Delta 17	790.7	195.9
Delta 18	953.8	182.5
Delta 19	1020.5	181.2
Delta 20	780.2	135.5
Delta 21	865.3	210.7
Delta 22	1080.9	242.1
WT 1	428.1	157.5
WT 2	611.4	180.1
WT 3	993.2	178
WT 4	592.8	164.8
WT 5	703.5	143
WT 6	710.4	162.3
WT 7	1041	175.6
WT 8	743.2	178
WT 9	739.5	173.5
WT 10	1114.6	186.5
WT 11	991.4	184.8
WT 12	781	203.9
WT 13	633.1	135.8
WT 14	1264.3	190.6
WT 15	823.4	201.9
WT 16	987	196.3
WT 17	541.9	213.7
WT 18	1070	209.4
WT 19	935.7	190.4
WT 20	542.3	151.7
WT 21	867.8	147.5
WT 22	449.9	154.5
WT 23	879.1	165.8
WT 24	685.3	155.4
